# Supplementary material for: Identification of a pan-cancer oncogenic microRNA superfamily anchored by a central core seed motif
Source: PubMed Central journal article supplement — Nat Commun. 2013 Nov 13;4:2730. doi: 10.1038/ncomms3730 (PMC3868236; doi:10.1038/ncomms3730), 2013-11-13
Supplement: ncomms3730-s1.pdf [file ncomms3730-s1.pdf]

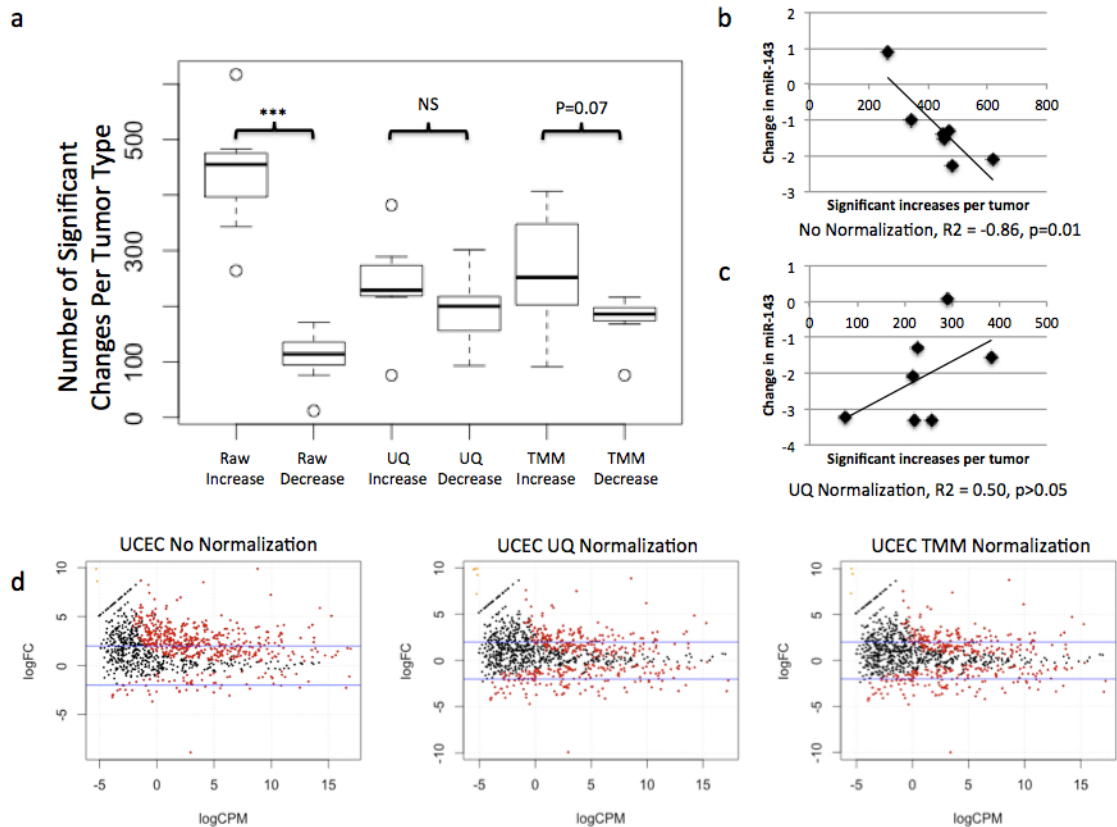

**Supplementary Figure S1. Composition differences between tumor and normal due to large changes in highly expressed microRNAs are corrected through UQ or TMM normalization.** A) There are significantly more significantly increased microRNAs than significantly decreased microRNAs in the TCGA miRNA data. Composition based normalization procedures correct for these deficits. Boxplot means are represented by horizontal line, boxes encompass the first and third quartile, whiskers represent 1.5x the inter-quartile range, outliers are represented as open circles outside the plot area. B) The total number of significant increases per tumor directly correlates with changes in *miR-143* levels (Pearson correlate,  $n = 7$  tumor types,  $p$ -value calculated through T-Distribution). C) UQ normalization ablates the relationship between significant change and *miR-143* levels (Pearson correlate,  $n = 7$  tumor types). D) Smear plots of representative UCEC data demonstrating successful normalization of miRNA sequencing data using normalization procedures that focus on correcting for composition differences. Red tags represent significant change ( $p < 0.005$ , Fisher's exact test). \*\*\* $p < 0.005$ , UQ = upper-quartile normalization, TMM = Trimmed mean of M-values normalization, UCEC = Uterine corpus endometrioid carcinoma (representative tumor data). FC = Fold Change. CPM = Counts Per Million. Log values are log base two.

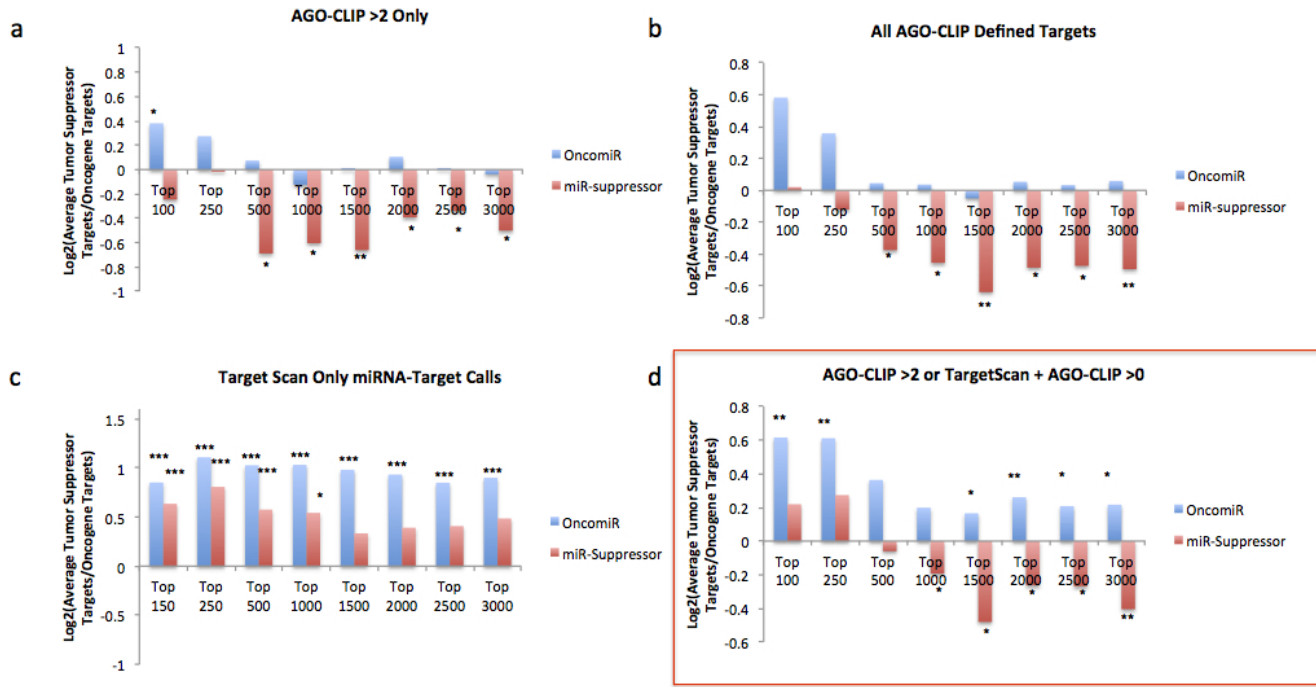

**Supplementary Figure S2. MicroRNA-target enrichment analysis suggests a combination of AGO-CLIP and TargetScan data produces the best target nomination criteria as defined by significant enrichment of Tumor-Suppressor targets by oncomiRs and oncogene targets by miR-suppressors.** Plots represent average percent tumor-suppressor versus percent oncomiR targets for Pan-Cancer oncomiRs and miR-suppressors. Graphs were generating by taking log2 ratio of tumor-suppressor over oncogene targets for each. A) AGO-CLIP defined targets with  $\geq 3$  occurrences enrich for oncogene targets of miR-suppressors only. B) All AGO-CLIP defined targets similarly enrich only for oncogene targets of miR-suppressors. C) TargetScan only target calls enrich for tumor suppressor targets. D) Combining AGO-CLIP data with TargetScan data (AGO-CLIP  $\geq 3$  or AGO-CLIP  $\geq 1$  + TargetScan) produces expected enrichments in tumor-suppressor targets for oncomiRs and oncogene targets for miR-suppressors. Student's T-Test, \* $p < 0.05$ , \*\* $p < 0.005$ . N-values for enrichment reflect the total number of Pan-Cancer oncomiRs ( $n=22$ ) and Pan-Cancer miR-suppressors ( $n=25$ ). Further analysis was performed using method D (red box).

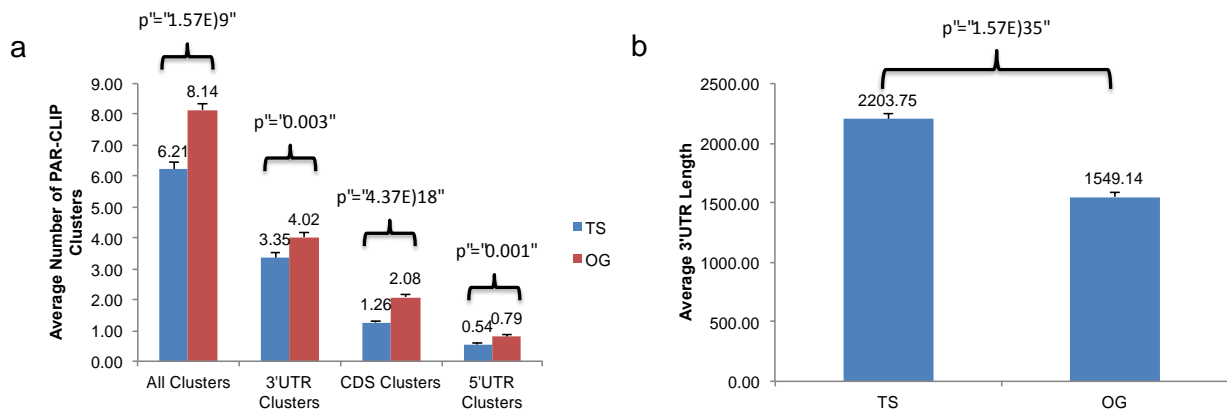

**Supplementary Figure S3. Differential microRNA targeting and 3'UTR length of ranked tumor suppressors and oncogenes.** A) Oncogenes have 31% more total clusters than tumor-suppressors, much of this differential targeting may derive from targeting of the coding region, which have on average 66% more total clusters than tumor suppressors. Data derives from the combination of 11 PAR-CLIP libraries used in this study, and reflects values for the top 3000 tumor suppressors and oncogenes. Error bars are s.e.m. . B) Tumor suppressors have, on average, 40% longer 3'UTRs than oncogenes. This may lead to increased identification of microRNA target sites on tumor suppressors by TargetScan. Data refers to the top 3000 tumor suppressors and oncogenes in our analysis (n=3000, p-values obtained with T-Test). Genomic coordinates for 3'UTR length derive from UCSC known genes. Error bars are s.e.m. TS = Tumor Suppressor, OG = Oncogene, 3'UTR = 3' untranslated region, CDS = coding sequence, 5'UTR = 5' untranslated region.

**Supplementary Table S1.** TCGA microRNA data inventory. All data was downloaded as isoform reads per million from the TCGA portal. List is fully up-to-date from the TCGA data portal as of 11-20-2012. Bolded tumors are included in Pan-Cancer Whitelist tumors included in this study.

| Cancer Type                                                      | TCGA Acronym | Tumor      | Matched Normal | Unmatched Normal |
|------------------------------------------------------------------|--------------|------------|----------------|------------------|
| <b>Acute Myeloid Leukemia</b>                                    | <b>LAML</b>  | <b>187</b> | <b>0</b>       | <b>0</b>         |
| <b>Bladder Urothelial</b>                                        | <b>BLCA</b>  | <b>124</b> | <b>16</b>      | <b>0</b>         |
| Brain Low Grade Glioma                                           | LGG          | 180        | 0              | 0                |
| <b>Brease Invasive Carcinoma</b>                                 | <b>BRCA</b>  | <b>886</b> | <b>98</b>      | <b>2</b>         |
| Cervical Squamous Cell Carcinoma and Endocervical Adenocarcinoma | CESC         | 122        | 2              | 0                |
| <b>Colon Adenocarcinoma</b>                                      | <b>COAD</b>  | <b>411</b> | <b>0</b>       | <b>0</b>         |
| <b>Head and Neck Squamous Cell Carcinoma</b>                     | <b>HNSC</b>  | <b>309</b> | <b>38</b>      | <b>0</b>         |
| <b>Kidney Renal Clear Cell</b>                                   | <b>KIRC</b>  | <b>480</b> | <b>67</b>      | <b>4</b>         |
| Kidney Renal Papillary Cell                                      | KIRP         | 103        | 25             | 1                |
| Liver Hepatocellular Carcinoma                                   | LIHC         | 96         | 49             | 1                |
| <b>Lung Adenocarcinoma</b>                                       | <b>LUAD</b>  | <b>366</b> | <b>39</b>      | <b>6</b>         |
| <b>Lung Squamous Cell Carcinoma</b>                              | <b>LUSC</b>  | <b>332</b> | <b>35</b>      | <b>0</b>         |
| Lymphoid Neoplasm Diffuse Large B-cell Lymphoma                  | DLBC         | 16         | 0              | 0                |
| <b>Ovarian Serous Cystadenocarcinoma</b>                         | <b>OV</b>    | <b>462</b> | <b>0</b>       | <b>0</b>         |
| Pancreatic Adenocarcinoma                                        | PAAD         | 34         | 0              | 0                |
| Prostate Adenocarcinoma                                          | PRAD         | 174        | 50             | 0                |
| <b>Rectal Adenocarcinoma</b>                                     | <b>READ</b>  | <b>144</b> | <b>0</b>       | <b>0</b>         |
| Sarcoma                                                          | SARC         | 30         | 0              | 0                |
| Skin Cutaneous Melanoma                                          | SKCM         | 241        | 0              | 0                |
| Stomach Adenocarcinoma                                           | STAD         | 151        | 24             | 0                |
| Thyroid Carcinoma                                                | THCA         | 352        | 43             | 1                |
| <b>Uterine Corpus Endometrioid Carcinoma</b>                     | <b>UCEC</b>  | <b>485</b> | <b>17</b>      | <b>12</b>        |
| Totals                                                           |              | 5685       | 503            | 27               |

**Supplementary Table S2.** Percent expression of the top 30 TCGA defined microRNAs in AGO-CLIP datasets.

| miRNA_ID      | BC1     | BC3     | EF3D-AGO2 | LCL-BAC | LCL-35  | SDLCL   | hESC    | 293T    |
|---------------|---------|---------|-----------|---------|---------|---------|---------|---------|
| hsa-mir-143   | 0.00000 | 0.00000 | 0.00012   | 0.00000 | 0.00000 | 0.00001 | 0.00030 | 0.00249 |
| hsa-mir-10b   | 0.00000 | #N/A    | #N/A      | #N/A    | 0.00001 | 0.00001 | 0.00000 | 0.00543 |
| hsa-mir-21    | 0.07409 | 0.08265 | 0.12911   | 0.09119 | 0.25568 | 0.09334 | 0.09277 | 0.00831 |
| hsa-mir-22    | 0.00002 | 0.00019 | 0.00209   | 0.00761 | 0.00095 | 0.00046 | 0.00285 | 0.00256 |
| hsa-mir-30a   | 0.00003 | 0.00001 | 0.00004   | 0.00000 | 0.00022 | 0.00004 | 0.00156 | 0.00285 |
| hsa-mir-10a   | 0.00004 | 0.00001 | 0.00015   | 0.00013 | 0.00091 | 0.00027 | 0.00000 | 0.00882 |
| hsa-mir-99b   | 0.00037 | #N/A    | #N/A      | #N/A    | 0.00000 | 0.00002 | 0.00040 | 0.00078 |
| hsa-mir-30a*  | 0.00003 | 0.00001 | 0.00000   | 0.00000 | 0.00011 | 0.00001 | 0.00020 | 0.00285 |
| hsa-mir-148a  | 0.00314 | 0.00096 | 0.01473   | 0.01241 | 0.01534 | 0.00520 | 0.00672 | 0.00468 |
| hsa-mir-203   | #N/A    | #N/A    | #N/A      | #N/A    | #N/A    | #N/A    | 0.00005 | 0.00268 |
| hsa-let-7b    | #N/A    | #N/A    | 0.00440   | 0.00221 | 0.00399 | 0.00056 | 0.00000 | 0.00895 |
| hsa-mir-101-1 | 0.00243 | 0.00059 | 0.00169   | 0.00223 | 0.00427 | 0.00202 | 0.00758 | 0.00475 |
| hsa-let-7a-2  | #N/A    | #N/A    | 0.05539   | 0.02518 | 0.02751 | 0.01960 | 0.00070 | 0.00603 |
| hsa-mir-100   | 0.00000 | #N/A    | #N/A      | #N/A    | #N/A    | #N/A    | 0.00010 | 0.00167 |
| hsa-mir-103-1 | 0.01641 | 0.00144 | 0.03708   | 0.02917 | 0.02623 | 0.05206 | 0.01327 | 0.00498 |
| hsa-let-7f-2  | #N/A    | #N/A    | 0.05320   | 0.02002 | 0.02590 | 0.01744 | 0.00030 | 0.00520 |
| hsa-mir-30d   | 0.00737 | 0.00089 | 0.00270   | 0.00249 | 0.00395 | 0.00206 | 0.00135 | 0.00158 |
| hsa-mir-30e*  | 0.00354 | 0.00058 | 0.00090   | 0.00111 | 0.00172 | 0.00145 | 0.00070 | 0.00148 |
| hsa-mir-92a-2 | 0.02389 | 0.00937 | 0.00704   | 0.01380 | 0.01408 | 0.01247 | 0.00827 | 0.03653 |
| hsa-mir-29a   | 0.00115 | 0.00303 | 0.01082   | 0.01848 | 0.01284 | 0.01058 | 0.00114 | 0.00212 |
| hsa-let-7a-3  | #N/A    | #N/A    | 0.05539   | 0.02518 | 0.02751 | 0.01960 | 0.00070 | #N/A    |
| hsa-let-7a-1  | #N/A    | #N/A    | 0.05539   | 0.02518 | 0.02751 | 0.01960 | 0.00070 | 0.00603 |
| hsa-mir-375   | 0.00000 | #N/A    | #N/A      | #N/A    | #N/A    | #N/A    | 0.00000 | 0.00059 |
| hsa-mir-25    | 0.00309 | 0.00171 | 0.00137   | 0.00266 | 0.00232 | 0.00219 | 0.00735 | 0.00778 |
| hsa-mir-30e   | 0.00354 | 0.00058 | 0.00090   | 0.00111 | 0.00172 | 0.00145 | 0.00534 | 0.00148 |
| hsa-mir-182   | 0.00265 | 0.00031 | 0.00004   | 0.00005 | 0.00005 | 0.00003 | 0.00083 | 0.00152 |
| hsa-let-7c    | #N/A    | #N/A    | 0.00023   | 0.00014 | 0.00046 | 0.00018 | 0.00005 | 0.00178 |
| hsa-mir-200c  | 0.00001 | 0.00002 | 0.00019   | 0.00023 | 0.00009 | 0.00012 | 0.00480 | 0.00077 |
| hsa-mir-28    | 0.00000 | 0.00003 | #N/A      | #N/A    | #N/A    | #N/A    | 0.00050 | 0.00067 |
| hsa-mir-145   | #N/A    | #N/A    | 0.00002   | 0.00000 | 0.00000 | 0.00000 | 0.00005 | 0.00025 |

**Supplementary Table S3.** AGO-CLIP and TargetScan miRNA-target prediction methods produce two different spectrums of target prediction for the Pan-Cancer microRNAs defined in this study.

| Values for Pan-Cancer oncomiRs and miR-suppressors   | Percentage |
|------------------------------------------------------|------------|
| % AGO-CLIP Targets >2                                | 31.65%     |
| % TargetScan targets without AGO-CLIP peak           | 74.39%     |
| % TargetScan targets with AGO-CLIP peak              | 25.61%     |
| % AGO-CLIP targets Called by TargetScan              | 31.47%     |
| % AGO-CLIP targets not called by TargetScan          | 68.53%     |
| % AGO-CLIP targets outside 3'UTR (CDS, 5'UTR, ncRNA) | 34.61%     |
| % AGO-CLIP 3'UTRs called by Target Scan              | 48.27%     |
| % of AGO-CLIP 3'UTR targets not called by TargetScan | 51.73%     |

**Supplementary Table S4.** Synapse identification codes associated with this study.

| File                                                      | Synapse ID |
|-----------------------------------------------------------|------------|
| TCGA Pan-Cancer Project                                   | syn300013  |
| Complete AGO-CLIP Atlas Data (clusters and seeds)         | syn1720733 |
| miSNP Output (Individual tumors and union seed-snv calls) | syn1720734 |
| GISTIC Scores                                             | syn1703335 |
| MuSiC Scores                                              | syn1729383 |
| MSKCC Driver Genes                                        | syn1720070 |
| Complete miRNA-seq Processed files                        | syn1856597 |
